# Supplementary material for: Thresholds for the value judgement of health technologies in the United Arab Emirates: a consensus approach through voting sessions
Source: PubMed Central journal article supplement — BMJ Open. 2024 Nov 4;14(11):e090344. doi: 10.1136/bmjopen-2024-090344 (PMC11535693; doi:10.1136/bmjopen-2024-090344), 2024-11-04
Supplement: bmjopen-14-11-s001.pdf [file bmjopen-14-11-s001.pdf]

## Supplementary File 1

### Participants Characteristics in the Voting Sessions

Table S1 Participants Characteristics

| <b>Participant number</b> | <b>Title</b>                                      | <b>Health Authority</b> |
|---------------------------|---------------------------------------------------|-------------------------|
| 1                         | Director Dubai Health Insurance Fund              | EHES                    |
| 2                         | Manager of Drugs & Medical Products               | DOH                     |
| 3                         | Clinical Pharmacist - Oncology - Tawam            | SEHA                    |
| 4                         | Senior Specialist                                 | ADEO                    |
| 5                         | Consultant Rheumatology & Head of SEHA Committee  | SEHA                    |
| 6                         | Director Dubai Health Insurance Fund              | EHES                    |
| 7                         | Clinical Pharmacist - MOH                         | EHS                     |
| 8                         | President of Emirates Health Economics Society    | EHES                    |
| 9                         | Advisor Undersecretary Office - DOH               | DOH                     |
| 10                        | DOH - Payer sector - Authorization                | DOH                     |
| 11                        | DOH - Payer sector - Authorization                | DOH                     |
| 12                        | DOH - Payer sector - Authorization                | DOH                     |
| 13                        | Clinical Pharmacist & Pharmacy Head at SKMC       | SEHA                    |
| 14                        | Clinical Pharmacist                               | SEHA                    |
| 15                        | Clinical Pharmacist                               | SEHA                    |
| 16                        | Clinical Pharmacist                               | SEHA                    |
| 17                        | Clinical Pharmacist & Pharmacy Head at SSMC       | SSMC                    |
| 18                        | Clinical Pharmacist                               | SSMC                    |
| 19                        | Clinical Pharmacist                               | SSMC                    |
| 20                        | Clinical Pharmacist - Tawam                       | SEHA                    |
| 21                        | Clinical Pharmacist - Tawam                       | SEHA                    |
| 22                        | Clinical Pharmacist - Tawam                       | SEHA                    |
| 23                        | Section Head Technology Assessment and Innovation | DOH                     |

EHES: Emirates Health Economics Society, DOH: Department of Health, SEHA: Abu Dhabi Health Services Company, ADEO: Abu Dhabi Executive Office, EHS: Emirates Health Services, SSMC: Sheikh Shakhbout Medical City

## CET Application (Example)

The following is an example for calculating the CET:

For treating disease X, two interventions, A and B, were evaluated, with intervention A achieving a QALY gain of 1.5 and intervention B a QALY gain of 2.0. The average lifespan of individuals with the disease is 75 years, in comparison to 85 years for those without the condition. Furthermore, disease X is categorized as a rare disease by regulatory authorities such as the EMA or FDA.

Based on the provided information, the CET is calculated as follows:

- 1- Calculate the proportional/relative shortfall

$$\text{Proportional/ Relative Shortfall} = \frac{\text{Disease-related QALY loss (AS)}}{\text{Remaining QALY expectation in the absence of the disease}}$$

$$\text{Proportional/RelativeShortfall} = \frac{(85 - 75)}{85} = \mathbf{0.1176} \text{ --- > (1)}$$

- 2- Calculate the IRQG

$$\text{IRQG} = \frac{\text{QALY}_{\text{new technology}} - \text{QALY}_{\text{comparator}}}{\text{QALY}_{\text{new technology}}}$$

$$\text{IRQG} = \frac{2 - 1.5}{2} = \mathbf{0.25} \text{ --- > (2)}$$

- 3- Assess the rarity of the disease

According to the provided information, Disease X is considered a rare disease according to the FDA and EMA.

Therefore

$$\text{is\_Rare} = \mathbf{1} \text{ --- > (3)}$$

Based on (1), (2), and (3), the multiplier for calculating the CET =

$$\text{Multiplier} = (\text{Relative Shortfall} + 1) \times (\text{IRQG} + 1) \times (\text{is\_rare} \times 2 + 1)$$

$$\text{Multiplier} = (0.12 + 1) \times (0.25 + 1) \times (1 \times 2 + 1) = 4.19$$

Therefore, the CET is calculated as follows:

$$\text{CET (localcurrency)} = 0.75 \times \text{Multiplier} \times \text{GDP/Capita}$$

$$\text{CET (localcurrency)} = 0.75 \times 4.19 \times 194,425 = 611,152 \text{ AED}$$
